# Supplementary material for: Serum Proteomic Analysis Identifies SAA1, FGA, SAP, and CETP as New Biomarkers for Eosinophilic Granulomatosis With Polyangiitis
Source: Front Immunol. 2022 Jun 10;13:866035. doi: 10.3389/fimmu.2022.866035 (PMC9226334; doi:10.3389/fimmu.2022.866035)
Supplement: Supplementary file 3 [file Table_3.xlsx]

## Sheet: Supplementary Table S3
Supplementary Table 3. The differentially expressed proteins between EGPA and healthy control groups.
UniProt Id	Gene name	Protein name	Log2 ratio	Q value
P02751	FN1	FINC	-1.103	＜0.001
P07996	THBS1	TSP1	-1.103	＜0.001
P40197	GP5	GPV	-1.017	＜0.001
Q15166	PON3	PON3	-1.009	0.026
P04180	LCAT	LCAT	-0.834	＜0.001
P41222	PTGDS	PTGDS	-0.727	＜0.001
P02746	C1QB	C1QB	-0.702	＜0.001
P05543	SERPINA7	THBG	-0.631	＜0.001
Q13201	MMRN1	MMRN1	-0.628	0.001
P49747	COMP	COMP	-0.623	0.022
O14791	APOL1	APOL1	-0.62	＜0.001
P02749	APOH	APOH	-0.604	＜0.001
Q9NZP8	C1RL	C1RL	-0.603	0.002
P08185	SERPINA6	CBG	-0.596	＜0.001
Q86YZ3	HRNR	HORN	-0.589	0.001
Q0VDD8	DNAH14	DYH14	-0.584	＜0.001
P18428	LBP	LBP	0.596	＜0.001
P11597	CETP	CETP	0.621	0.043
P11021	HSPA5	BIP	0.627	＜0.001
P00748	F12	FA12	0.632	＜0.001
P02748	C9	CO9	0.695	＜0.001
P00747	PLG	PLMN	0.717	＜0.001
P55056	APOC4	APOC4	0.737	0.008
P00746	CFD	CFAD	0.745	0.011
P20851	C4BPB	C4BPB	0.752	＜0.001
P02743	APCS	SAMP	0.767	＜0.001
P22891	PROZ	PROZ	0.777	0.023
P02763	ORM1	A1AG1	0.78	＜0.001
P63261	ACTG1	ACTG	0.794	0.03
Q9UGM5	FETUB	FETUB	0.797	＜0.001
O75636	FCN3	FCN3	0.808	＜0.001
P08637	FCGR3A	FCG3A	0.812	＜0.001
P43251	BTD	BTD	0.836	＜0.001
P19652	ORM2	A1AG2	0.838	＜0.001
P04040	CAT	CATA	0.869	0.023
Q06830	PRDX1	PRDX1	0.908	＜0.001
Q9Y5Y7	LYVE1	LYVE1	0.91	0.02
P02654	APOC1	APOC1	0.931	＜0.001
Q6UXB8	PI16	PI16	0.944	0.037
Q01973	ROR1	ROR1	0.959	0.009
P68871	HBB	HBB	0.967	＜0.001
P02760	AMBP	AMBP	1.011	＜0.001
P04217	A1BG	A1BG	1.027	＜0.001
O95445	APOM	APOM	1.035	＜0.001
Q9NPH3	IL1RAP	IL1AP	1.038	0.002
Q14624	ITIH4	ITIH4	1.043	＜0.001
P01833	PIGR	PIGR	1.053	＜0.001
P80108	GPLD1	PHLD	1.066	＜0.001
P11226	MBL2	MBL2	1.152	＜0.001
P35542	SAA4	SAA4	1.18	＜0.001
P49913	CAMP	CAMP	1.252	＜0.001
P07998	RNASE1	RNAS1	1.285	＜0.001
P06727	APOA4	APOA4	1.2911	＜0.001
P69905	HBA1	HBA	1.38	＜0.001
Q9BWP8	COLEC11	COL11	1.427	＜0.001
P05546	SERPIND1	HEP2	1.482	＜0.001
P02750	LRG1	A2GL	1.571	＜0.001
P00488	F13A1	F13A	1.588	＜0.001
P07477	PRSS1	TRY1	1.621	0.002
P02741	CRP	CRP	1.625	＜0.001
Q9Y490	TLN1	TLN1	2.155	0.003
P0DJI8	SAA1	SAA1	2.174	＜0.001
Q01459	CTBS	DIAC	2.257	＜0.001
P15924	DSP	DESP	2.257	＜0.001
P16070	CD44	CD44	2.267	＜0.001
P32119	PRDX2	PRDX2	2.357	＜0.001
P24592	IGFBP6	IBP6	2.366	＜0.001
P98160	HSPG2	PGBM	2.379	＜0.001
P00915	CA1	CAH1	2.413	＜0.001
Q9HDC9	APMAP	APMAP	3.395	0.001
P02671	FGA	FIBA	4.452	＜0.001
P02679	FGG	FIBG	6.767	＜0.001
P02675	FGB	FIBB	7.304	＜0.001
